# Supplementary material
Source: Royal Society of Chemistry journal article supplement (doi:10.1039/d6qm00080k)
Supplement: d6qm00080k1.pdf [file d6qm00080k1.pdf]

Supplementary Information for:

## Suppressed Boron Doping in Electrospun Carbon Webs from Polyacrylonitrile-Based Polymer Blends

*Tara T. Huang<sup>1</sup>, Shao-Hsiang Hung<sup>2</sup>, Varun Pande<sup>1</sup>, Prateek<sup>1</sup>, Ryoh Katoh<sup>1</sup>, Tatsuki Abe<sup>3</sup>, Keiji Tanaka<sup>3</sup>, Wei Fan<sup>2</sup>, James J. Watkins<sup>1</sup>, Jessica D. Schiffman<sup>2,4</sup> & Reika Katsumata<sup>1\*</sup>*

<sup>1</sup>Department of Polymer Science and Engineering, University of Massachusetts Amherst, Amherst, Massachusetts, United States

<sup>2</sup>Department of Chemical and Biomolecular Engineering, University of Massachusetts Amherst, Amherst, Massachusetts, United States

<sup>3</sup>Centre for Polymer Interface and Molecular Adhesion Science, Kyushu University, Fukuoka, Japan

<sup>4</sup>Materials Science and Engineering Graduate Program, University of Massachusetts Amherst, Amherst, Massachusetts, United States

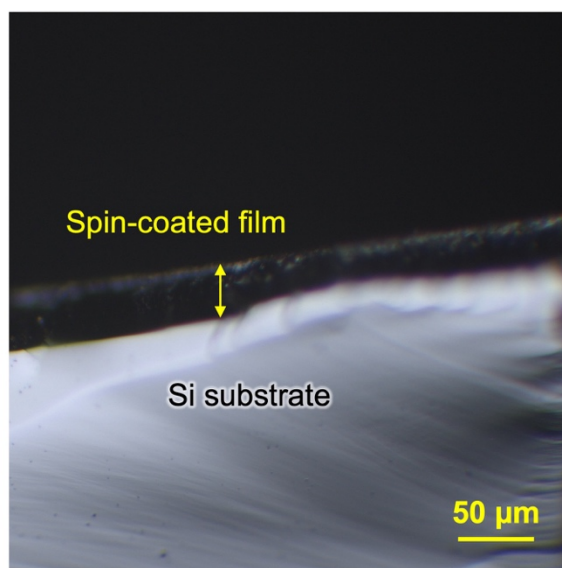

**Fig. S1** Optical microscopy (OM) cross-sectional image of a spin-coated film on a Si substrate, showing a film thickness on the order of  $\sim 30 \mu\text{m}$ . The scale bar represents  $50 \mu\text{m}$ .

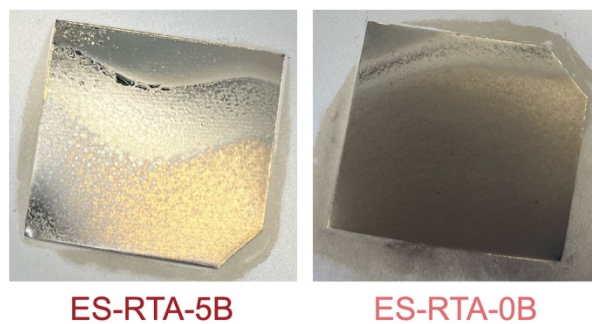

**Fig. S2** Photographs of electrospun fibers with (ES-RTA-5B) and without BDBA (ES-RTA-0B) after rapid thermal annealing (RTA) on 4 cm × 4 cm stainless-steel substrates, showing delamination following stabilization at 300 °C for 30 min and subsequent heating to 800 °C for 1 min.

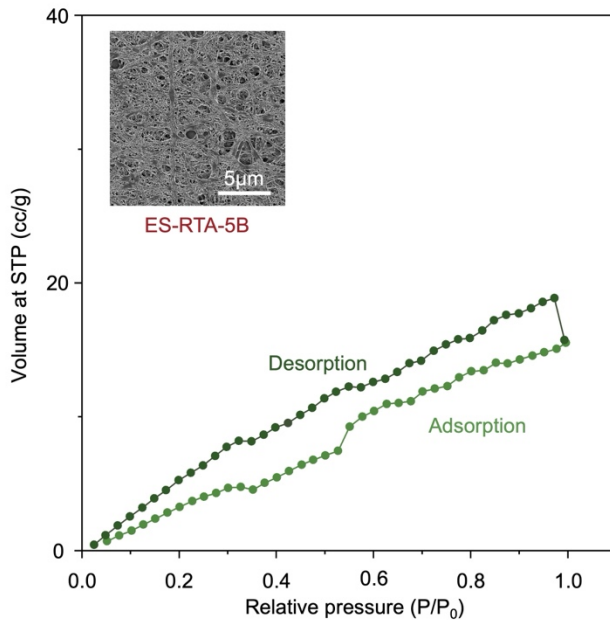

**Fig. S3** Nitrogen adsorption–desorption isotherms of the electrospun fiber sample containing BDBA after RTA (ES-RTA-5B). The inset shows an SEM image of the corresponding porous fibrous morphology. Scale bar represents 5  $\mu$ m.

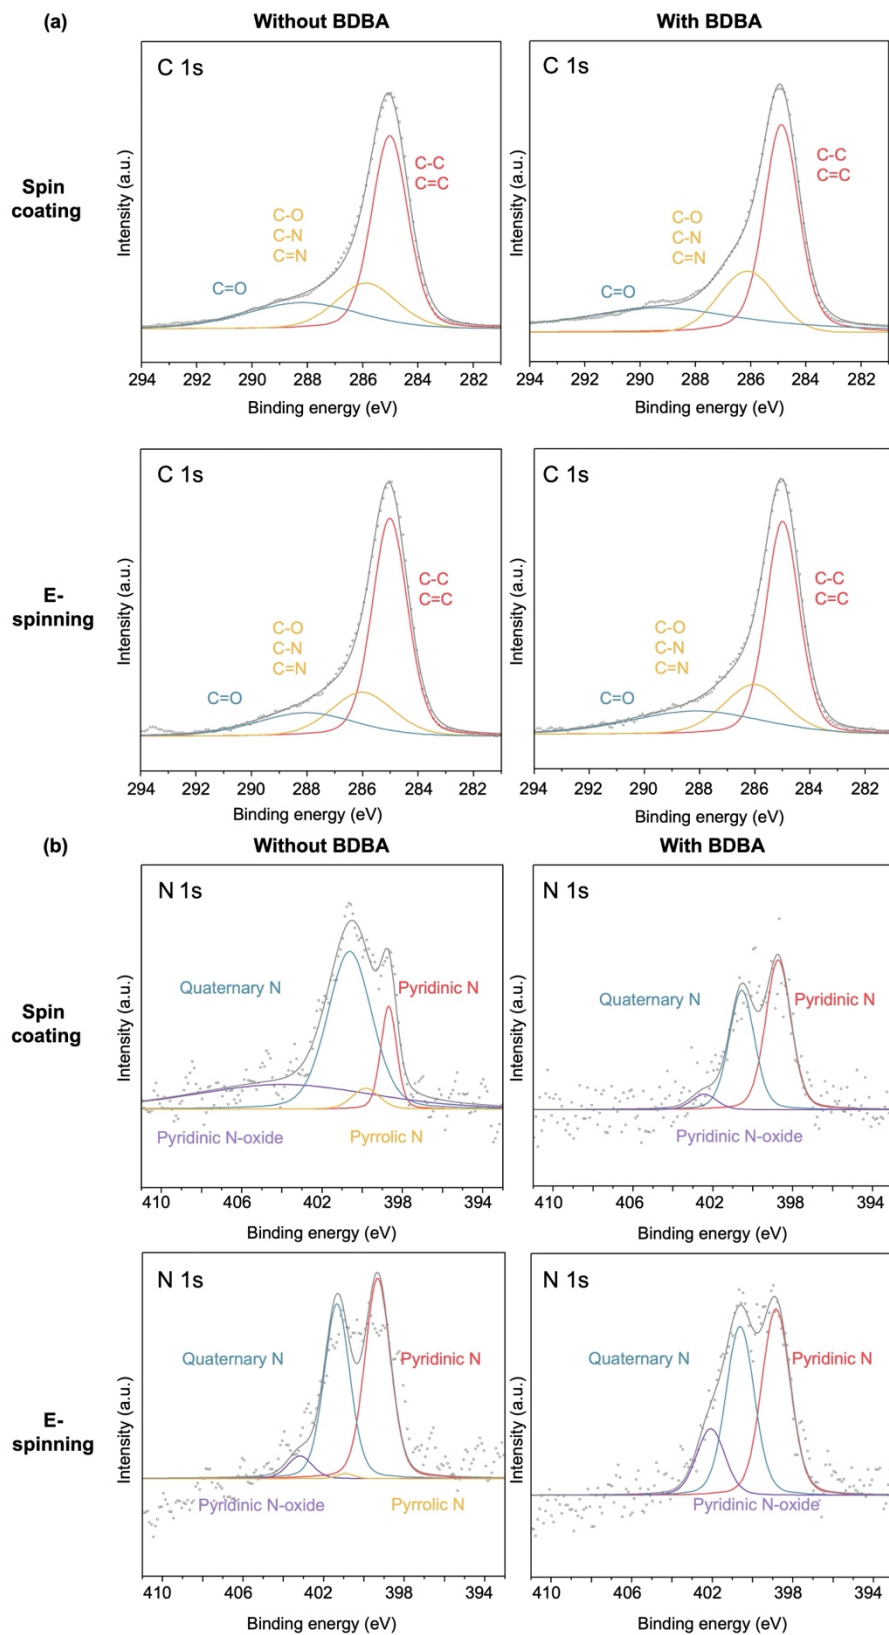

**Fig. S4** High-resolution XPS spectra of **(a)** C 1s and **(b)** N 1s regions for spin-coated films and electrospun fibers with and without BDBA after RTA. Peak deconvolution of the C 1s spectra

indicates contributions from C–C/C=C, C–N/C=N, C–O, and C=O bonding<sup>1–3</sup>, while the N 1s spectra show pyridinic N, pyrrolic N, quaternary N, and pyridinic N-oxide<sup>3,4</sup>. Although B–C bonding is evident in the B 1s spectra, it is not clearly seen in the C 1s spectra, likely due to the relatively low boron content.

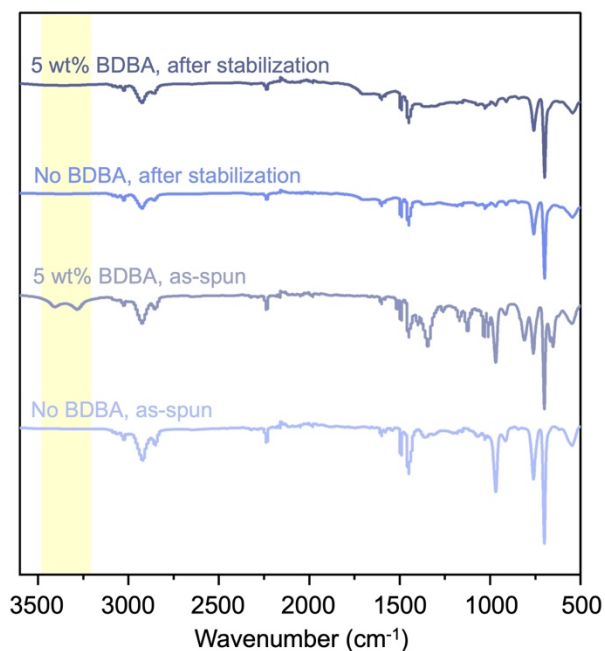

**Fig. S5** FTIR spectra of spin-coated films with and without BDBA before RTA (as-spun) and after stabilization (300 °C / 30 min). The boronic acid O–H stretching band ( $\sim 3250\text{--}3500\text{ cm}^{-1}$ ) present in BDBA-containing films disappears after stabilization, consistent with BDBA condensation.<sup>5</sup>

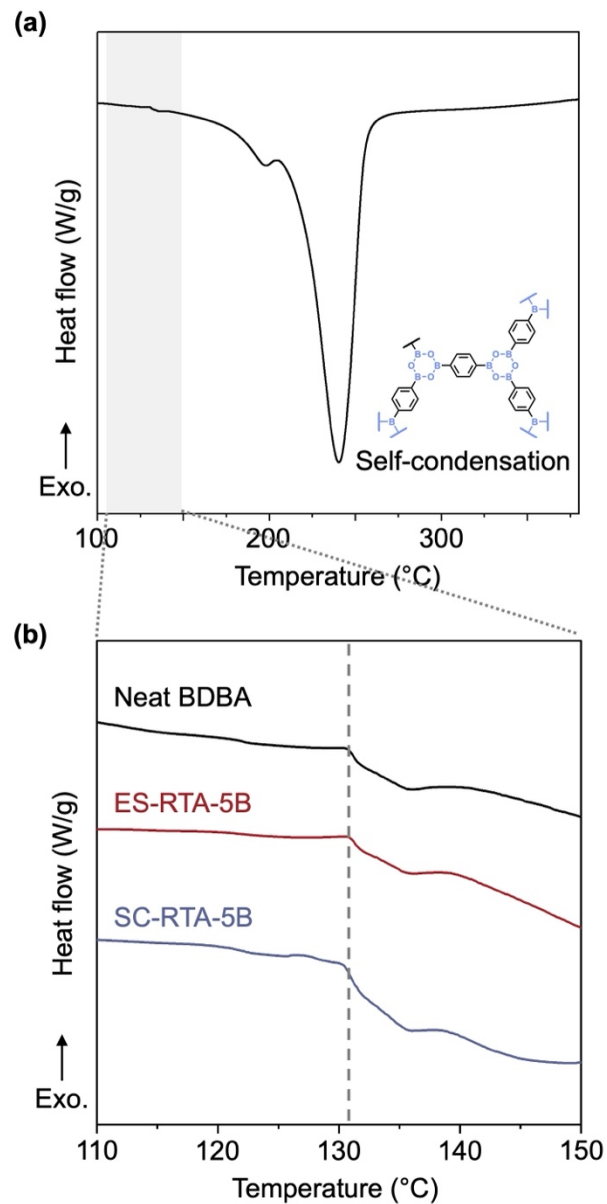

**Fig. S6** Differential scanning calorimetry (DSC, in air) trace of (a) neat benzene-1,4-diboronic acid (BDBA) and (c) BDBA-containing samples. A thermal feature with a comparable onset temperature ( $\sim 130\text{--}150$  °C) is observed in neat BDBA and in both electrospun fibers and spin-coated films containing BDBA, suggesting that this feature is associated with BDBA and is not strongly dependent on sample geometry.

**Table S1.** XPS elemental composition (at. %) of spin-coated films and electrospun fibers with and without BDBA after RTA.

| <b>Sample</b> | <b>C<br/>(at. %)</b> | <b>O<br/>(at. %)</b> | <b>N<br/>(at. %)</b> | <b>B<br/>(at. %)</b> |
|---------------|----------------------|----------------------|----------------------|----------------------|
| SC-RTA-5B     | 79.8                 | 14.3                 | 3.2                  | 2.7                  |
| ES-RTA-5B     | 81.2                 | 14.8                 | 3.6                  | 0.4                  |
| SC-RTA-0B     | 80.4                 | 15.9                 | 3.7                  | 0.0                  |
| ES-RTA-0B     | 80.3                 | 14.7                 | 5.0                  | 0.0                  |

## References

- (1) Senger, C.; Fan, X.; Pagaduan, J. N.; Zhang, X.; Ping, J.; Katsumata, R. Defect Healing in Graphene via Rapid Thermal Annealing with Polymeric “Nanobandage.” *Small* **2023**, *19* (10), 2206295. <https://doi.org/10.1002/sml.202206295>.
- (2) Susi, T.; Pichler, T.; Ayala, P. X-Ray Photoelectron Spectroscopy of Graphitic Carbon Nanomaterials Doped with Heteroatoms. *Beilstein J. Nanotechnol.* **2015**, *6*, 177–192. <https://doi.org/10.3762/bjnano.6.17>.
- (3) Pagaduan, J. N.; Bhardwaj, A.; McCarty, T. Y.; Kraemer, S.; Kearney, C. J.; Watkins, J. J.; Emrick, T.; Katsumata, R. Fabrication of Porous Heteroatom-Doped Carbon Networks via Polymer-Assisted Rapid Thermal Annealing. *Adv Funct Materials* **2024**, *34* (6), 2310296. <https://doi.org/10.1002/adfm.202310296>.
- (4) Zhong, M.; Kim, E. K.; McGann, J. P.; Chun, S.-E.; Whitacre, J. F.; Jaroniec, M.; Matyjaszewski, K.; Kowalewski, T. Electrochemically Active Nitrogen-Enriched Nanocarbons with Well-Defined Morphology Synthesized by Pyrolysis of Self-Assembled Block Copolymer. *J. Am. Chem. Soc.* **2012**, *134* (36), 14846–14857. <https://doi.org/10.1021/ja304352n>.
- (5) Ogden, W. A.; Guan, Z. Recyclable, Strong, and Highly Malleable Thermosets Based on Boroxine Networks. *J. Am. Chem. Soc.* **2018**, *140* (20), 6217–6220. <https://doi.org/10.1021/jacs.8b03257>.
